# Supplementary material for: Electrochemically switchable photoluminescence of an anionic dye in a cationic metallo-supramolecular polymer
Source: Royal Society of Chemistry journal article supplement (doi:10.1039/c5tc03071d), 2016-01-01
Supplement: c5tc03071d1.pdf [file c5tc03071d1.pdf]

Supporting Information

**Electrochemically switchable photoluminescence of anionic dye in  
cationic metallo-supramolecular polymer**

Takahiro Suzuki,<sup>a</sup> Takashi Sato,<sup>b</sup> Jian Zhang,<sup>b</sup> Miki Kanao,<sup>b</sup> Masayoshi Higuchi,<sup>\*b</sup> Hideyuki Maki<sup>\*a</sup>

<sup>a</sup>Department of Applied Physics and Physico-Informatics, Keio University, Yokohama, Kanagawa  
223-8522, Japan

<sup>b</sup>Electronic Functional Materials Group, National Institute for Materials Science (NIMS), Tsukuba,  
Ibaraki 305-0044, Japan

## Table of Contents

|                                                                                   |       |
|-----------------------------------------------------------------------------------|-------|
| 1. Materials and measurements                                                     | S 3   |
| 2. FTIR spectra of <b>polyFe</b> , <b>SRB</b> and <b>polyFe-SRB</b>               | S 3-4 |
| 3. <sup>1</sup> H-NMR spectra of <b>polyFe</b> , <b>SRB</b> and <b>polyFe-SRB</b> | S 5-8 |
| 4. Pictures of a <b>polyFe</b> device                                             | S 9   |
| 5. References                                                                     | S 9   |

## 1. Materials and measurements

Unless otherwise noted, all reagents were reagent grade and were used without purification. The IR spectra were taken on a Shimadzu FTIR 8400S Fourier Transform Infrared Spectrophotometer (400-4000  $\text{cm}^{-1}$ ) with KBr pellets.  $^1\text{H-NMR}$  spectra was recorded at 300 MHz on a JEOL AL 300/BZ instrument. Chemical shifts were given relative to TMS.

## 2. FTIR spectra of polyFe, SRB and polyFe-SRB

FTIR spectra of polyFe, SRB and polyFe-SRB is shown in Fig. S1-S3. In the spectra of polyFe, the bands at 1610, 1584 and 1560  $\text{cm}^{-1}$  corresponding to the C=C and C=N bonds stretching vibration in the ligands, and the band at 793  $\text{cm}^{-1}$  corresponding to the C-C bond between rings in the ligands were observed.<sup>1-2</sup> The absorption bands in the spectra of SRB were observed as reported in the previous study.<sup>3</sup> In the spectra of SRB, the bands at 1597, 1560, 1527, 1508, 1491 and 1468  $\text{cm}^{-1}$  corresponding to aromatic ring vibrations, the bands at 1132 and 669-615  $\text{cm}^{-1}$  corresponding to  $\text{SO}_3^-$ , and the band at 1647  $\text{cm}^{-1}$  corresponding to the C-N bond were observed. The spectra of polyFe-SRB was in good agreement with that of SRB because the IR absorption of SRB is stronger than that of polyFe. The noticeable difference of the spectra of polyFe-SRB from that of SRB is the absorption band at 795  $\text{cm}^{-1}$  corresponding to the C-C bonds between rings in the ligands.

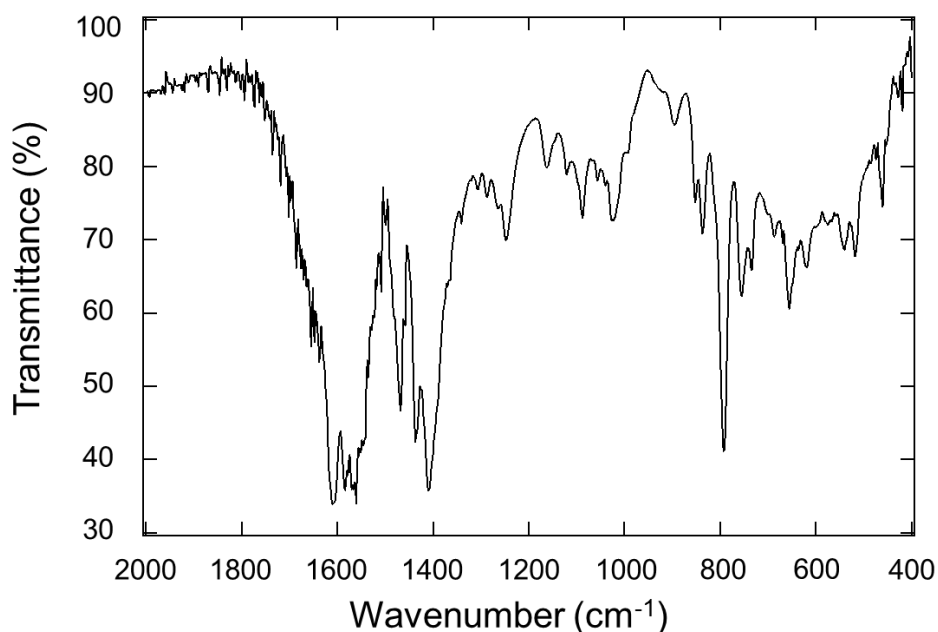

**Figure S1.** FTIR spectrum of **polyFe**.

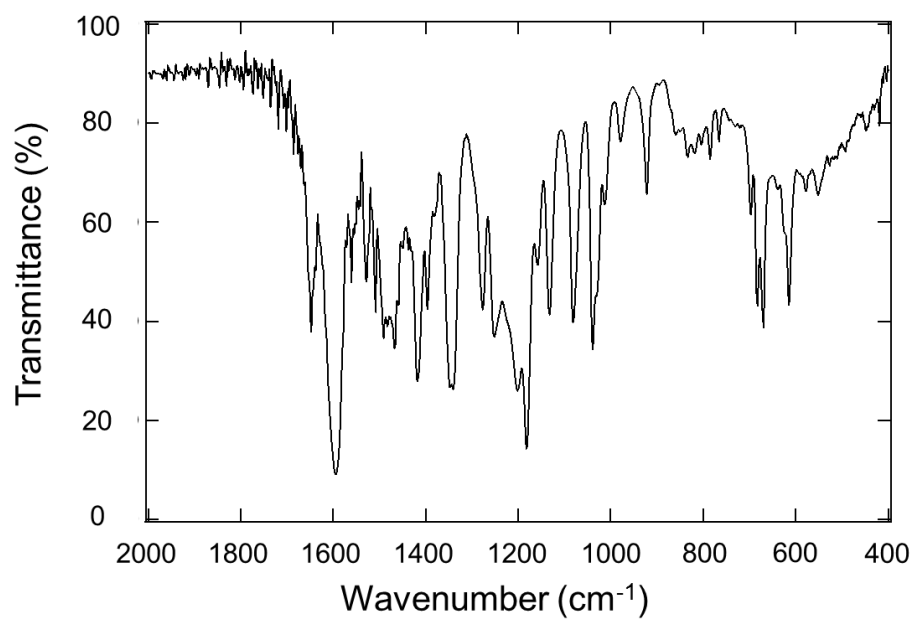

**Figure S2.** FTIR spectrum of **SRB**.

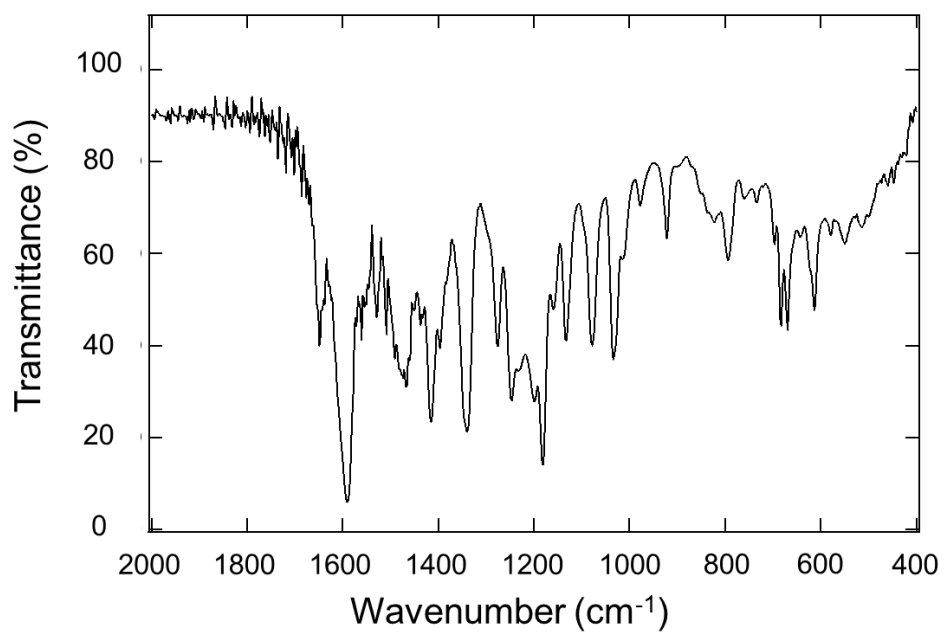

**Figure S3.** FTIR spectrum of **polyFe-SRB**.

### 3. $^1\text{H-NMR}$ spectra of polyFe, SRB and polyFe-SRB

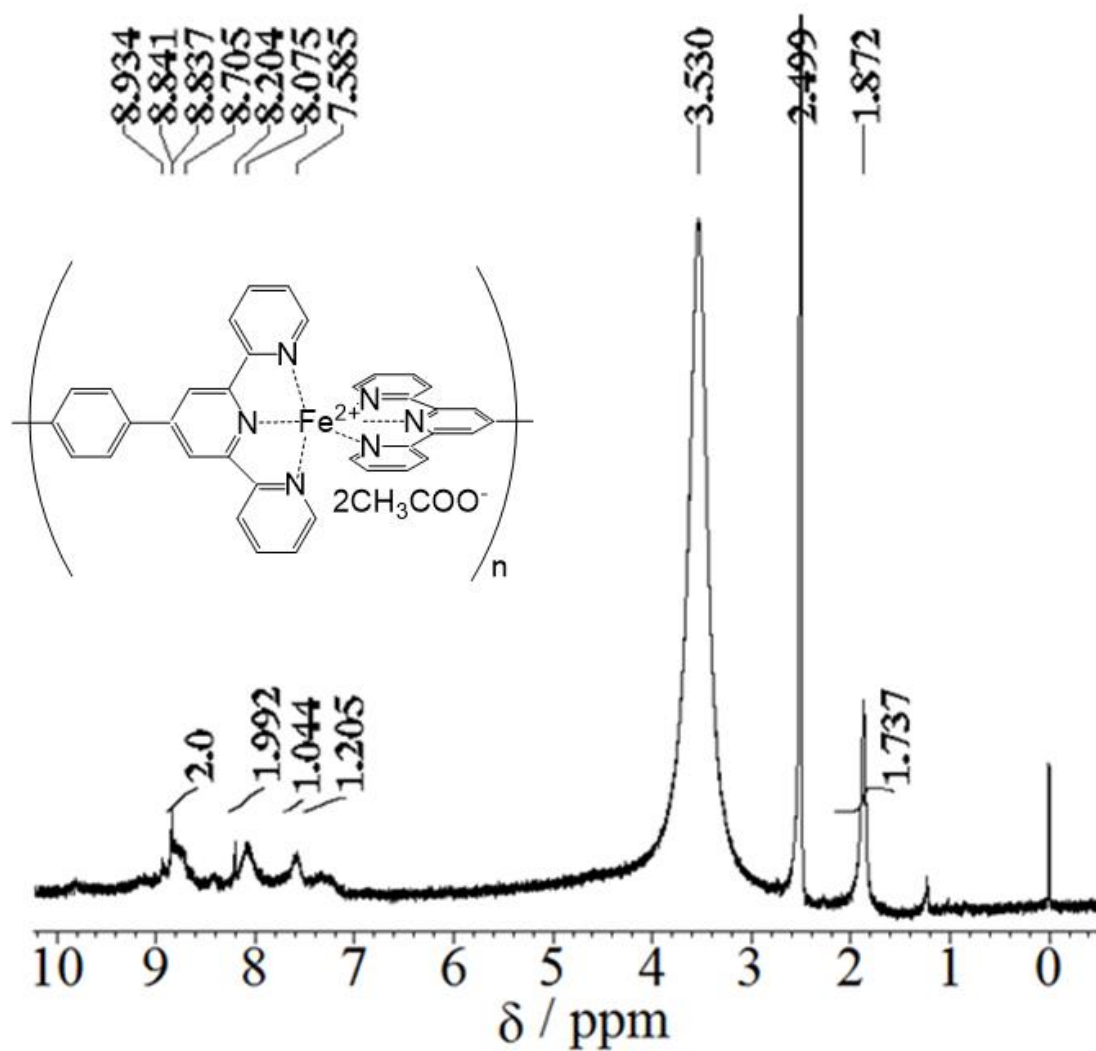

Figure S4.  $^1\text{H-NMR}$  spectrum of polyFe.

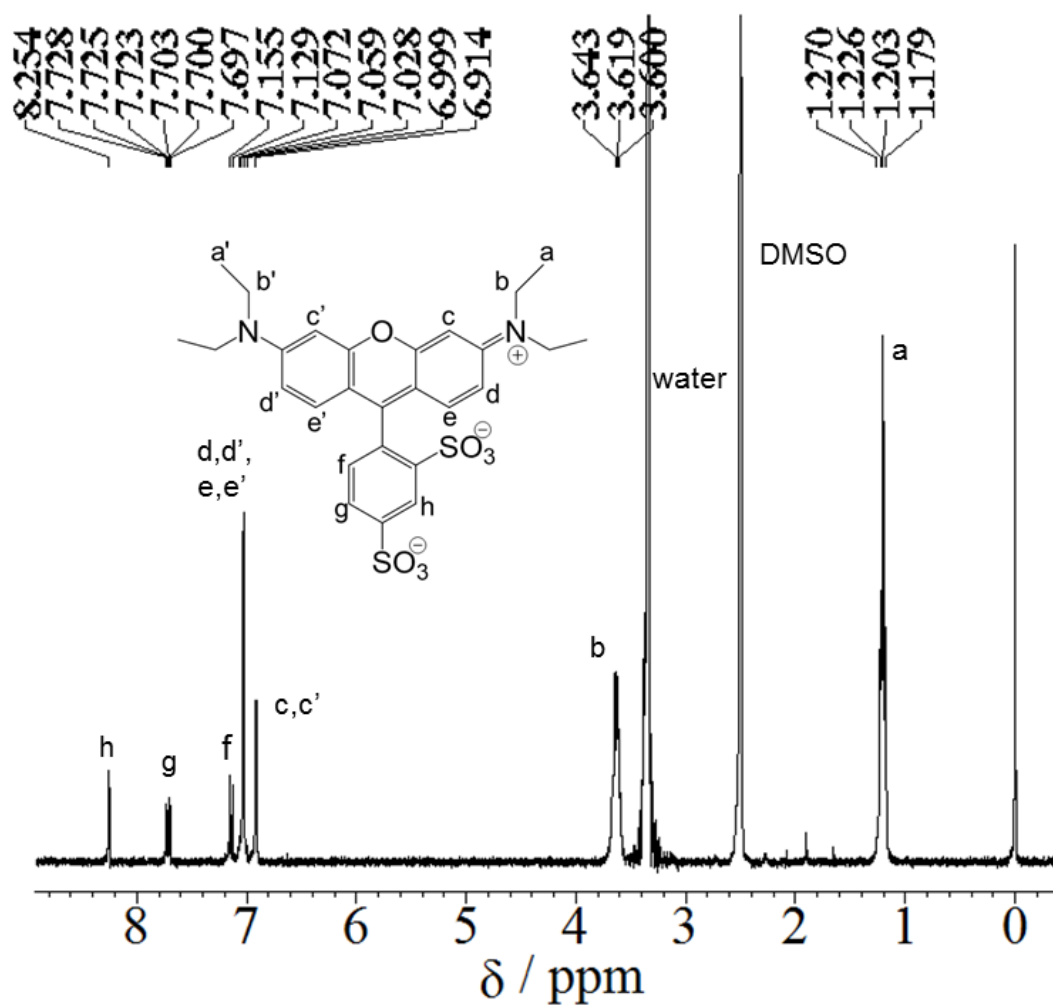

Figure S5.  $^1\text{H-NMR}$  spectrum of SRB.

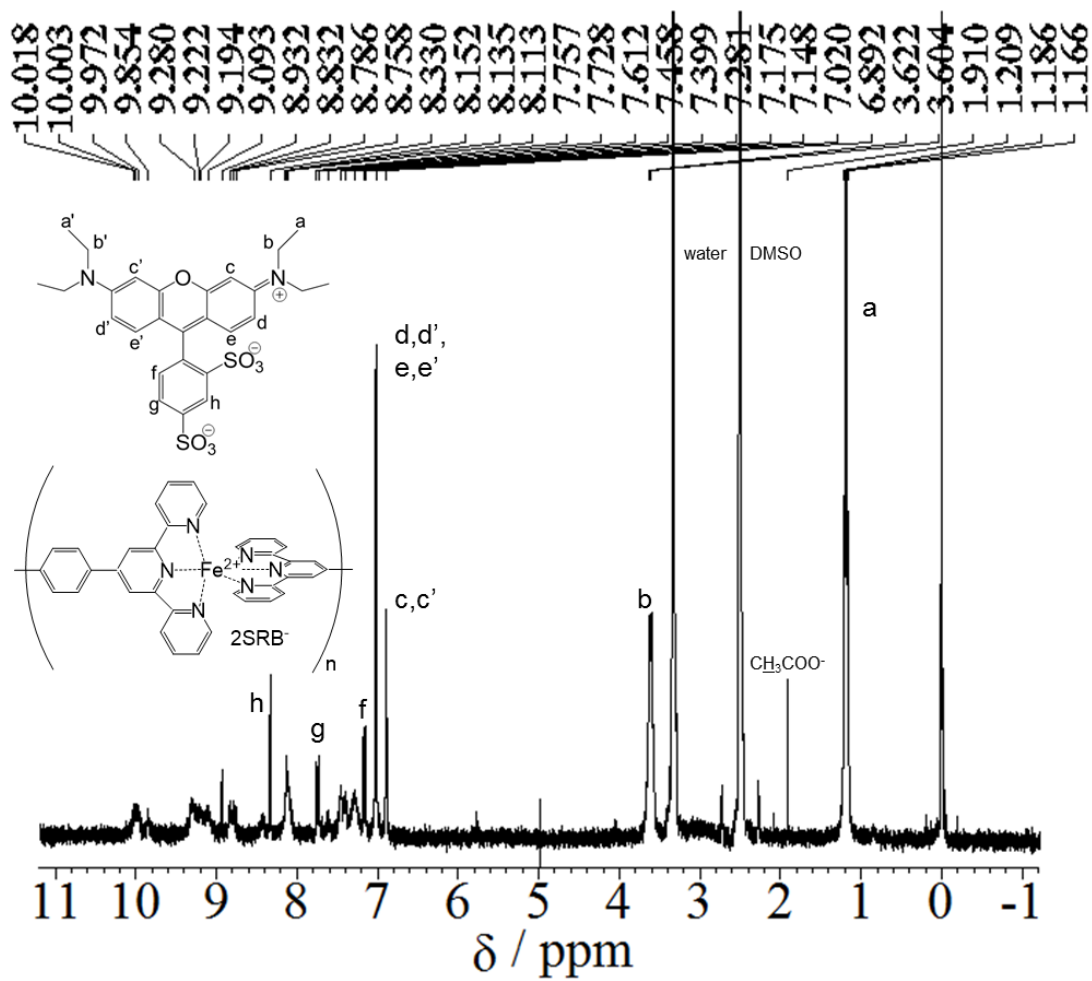

Figure S6. <sup>1</sup>H-NMR spectrum of polyFe-SRB.

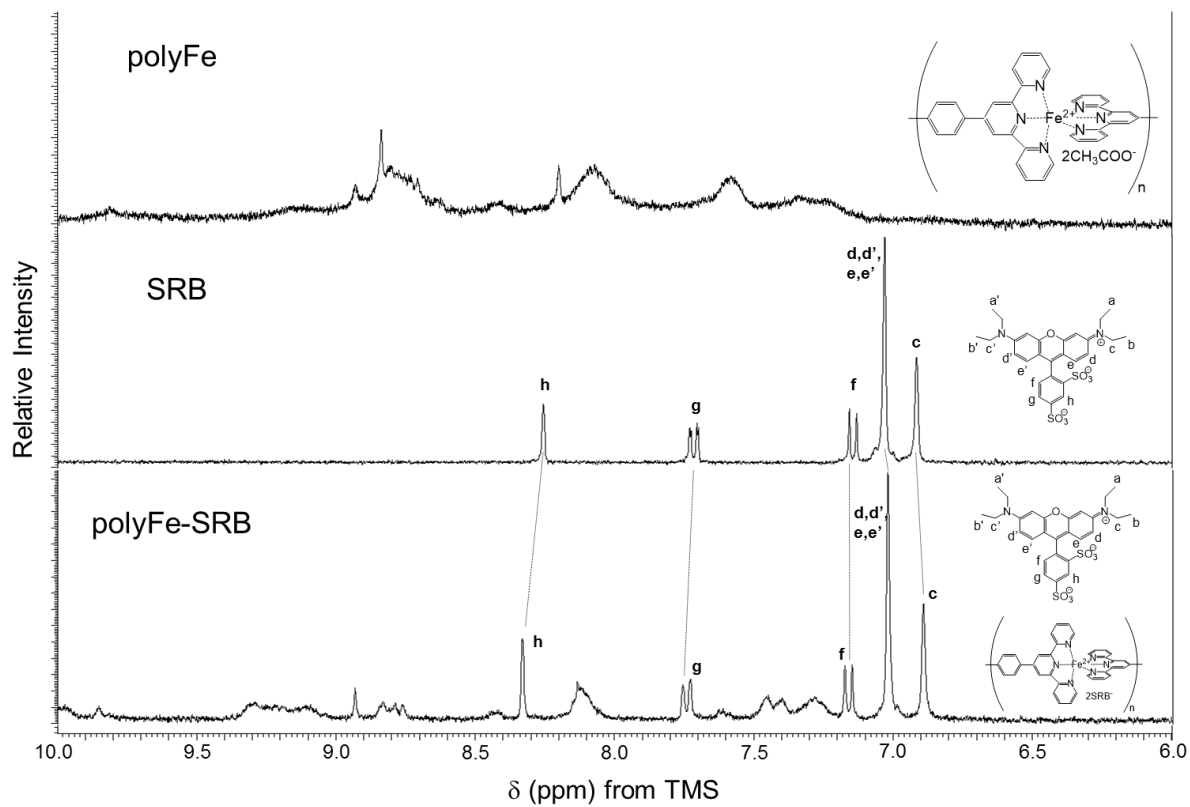

**Figure S7.**  $^1\text{H-NMR}$  spectra (only in the aromatic region) of **polyFe**, **SRB** and **polyFe-SRB**.



#### 4. Pictures of a polyFe device

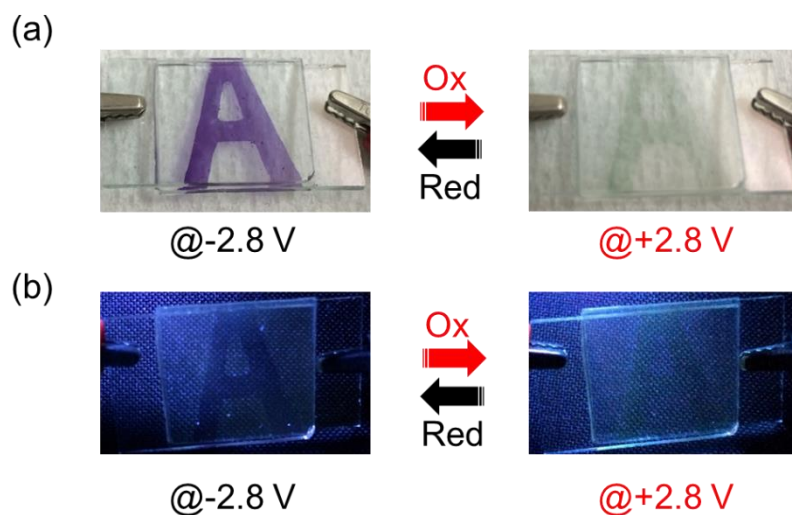

**Figure S8.** (a) Electrochromic change of a device using **polyFe** bearing acetate anions at -2.8 and 2.8 V and (b) pictures of the device under UV light irradiation.

#### 5. Reference

- [1] P. Zhang, Y. Wang, H. Liu and Y. Chen, *J. Mater. Chem.*, 2011, **21**, 18462
- [2] R. López, D. Villagra, G. Ferraudi and S. A. Moya, J. Guerrero, *Inorg. Chim. Acta*, 2004, **357**, 3525.
- [3] G. Liu, X. Li and J. Zhao, *Environ. Sci. Technol.*, 2000, **34**, 3982.
